# Supplementary material for: Different Localizations and Cellular Behaviors of Leiomodin and Tropomodulin in Mature Cardiomyocyte Sarcomeres
Source: PubMed Central journal article supplement — Mol Biol Cell. 2010 Oct 1;21(19):3352–61. doi: 10.1091/mbc.E10-02-0109 (PMC2947471; doi:10.1091/mbc.e10-02-0109), 2010-10-01

## SUPPLEMENTAL MATERIAL

**Supplemental Fig. S1. Nuclear localization of endogenous Lmod in cardiomyocytes after heat-shock and DMSO treatment.** (A) Cardiomyocytes cultured for 2 days were incubated with 10% DMSO for 1 h at 37°C and fixed. (B) Cardiomyocytes cultured for 2 days were incubated for 1 h in a water bath at 42-43°C, followed by fixation. Hepes 20 mM was added to cells before heat-shock to maintain a constant pH. After fixation, cells were co-stained with antibodies against Lmod and  $\alpha$ -actinin. Insets display images from an upper focal plane to highlight the presence of rod-like Lmod structures inside the nucleus after heat-shock and DMSO treatment. Bars, 10  $\mu$ m.

**Supplemental Fig. S2. The role of the C-terminal extension of Lmod in the latrunculin-B sensitivity of myofibril localization.** (A). Examples of representative cells expressing GFP-Lmod<sub>FL</sub> or GFP-Lmod<sub>1-342</sub> after 5 min and 15 min latrunculin-B treatment. Cells were co-stained with phalloidin and an antibody against the Z-disk protein  $\alpha$ -actinin. Bars, 10  $\mu$ m. (B.) Analysis of GFP-Lmod and GFP-Lmod<sub>1-342</sub> localization 5/15/30 min after treatment with 20  $\mu$ M latrunculin-B (LatB). Incubation of cardiomyocytes with latrunculin-B induced rapid dissociation of GFP-Lmod<sub>FL</sub> from sarcomeres, whereas the localization of GFP-Lmod<sub>1-342</sub> was less sensitive to this actin monomer sequestering drug. For each experiment, >30 cells were analyzed.

**Supplemental Fig. S3. Co-sedimentation of Lmod constructs with F-actin.** (A) Co-sedimentation of Lmod<sub>FL</sub> with F-actin in the absence and the presence of TM. Lmod<sub>FL</sub> purified using two affinity tags, first a C-terminal intein and second an N-terminal His-tag, includes two C-terminal degradation bands. In the absence of F-actin, all three Lmod bands are found in the supernatant. In the presence of F-actin, only the band corresponding to full-length protein partially cosediments with F-actin, indicating that a C-terminal sequence (most likely the W domain) is involved in the interaction with F-actin. The same result was obtained in the presence of TM (used at a 7:2 actin:TM ratio), indicating that TM does not increase nor prevent the binding of Lmod to F-actin. Notice that rabbit skeletal muscle TM consists of a natural mixture of  $\alpha$  and  $\beta$  isoforms present in muscle at a ratio of between 3 and 4 to 1. (B) The Tmod-like

construct Lmod<sub>1-342</sub> does not co-sediment significantly with F-actin in the absence or the presence of TM. This is consistent with our interpretation above that a C-terminal sequence, most likely the W domain, is responsible for the co-sedimentation with F-actin. Notice that Lmod<sub>1-342</sub> migrates only slightly higher than actin. The experiments shown here were carried out using 4-15% SDS gradient gels.

Skwarek-Maruszewska et al., Fig. S1

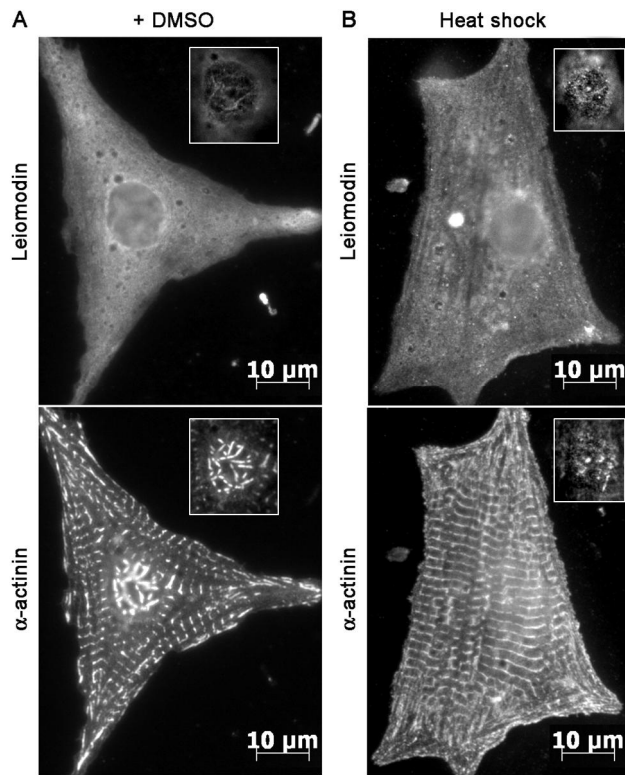

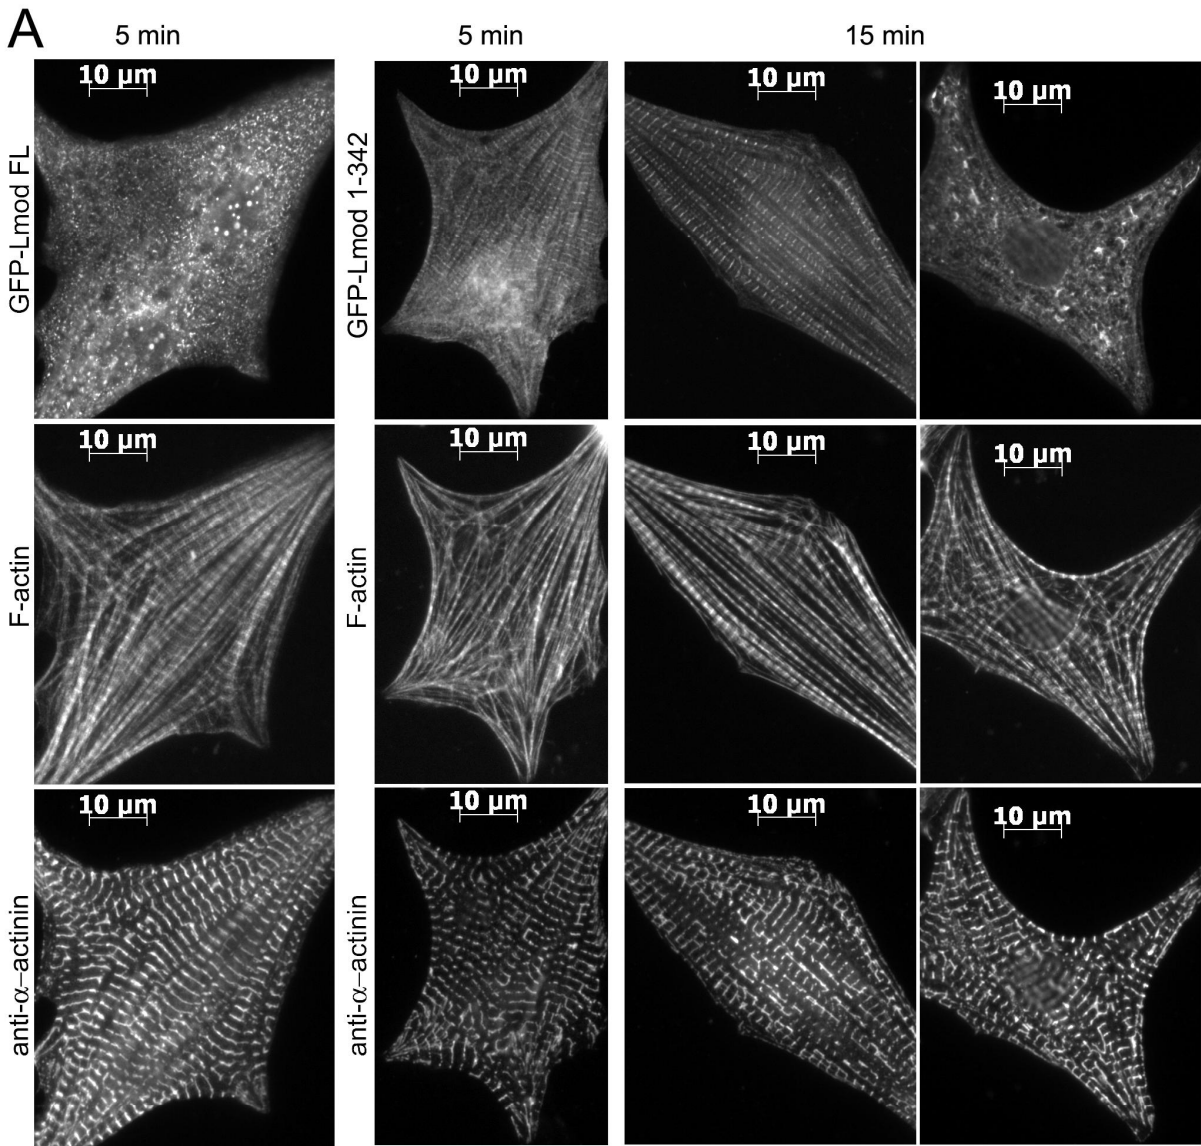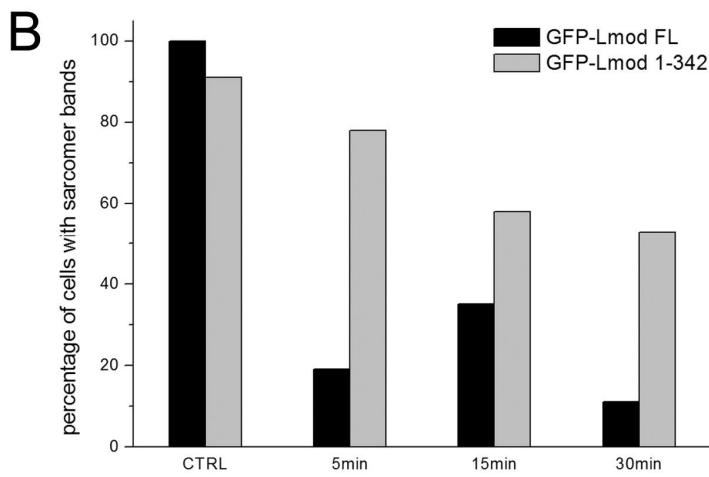

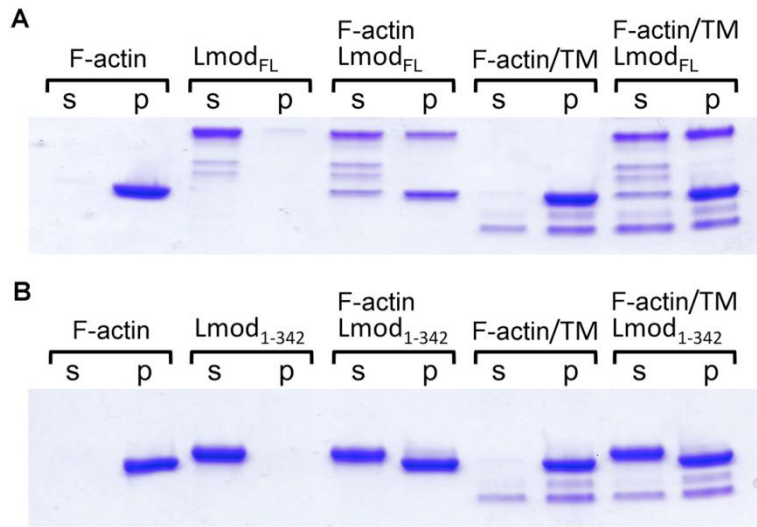

Supplement: E10-02-0109_1.pdf [file E10-02-0109_1.pdf]
